# Supplementary material
Source: publisher site journal article supplement (https://www.dovepress.com/article/371751)
Supplement: Supplementary file 1 [file get_supplementary_file.php]

**Application value of serum metabolic markers for cognitive prediction in elderly epilepsy**

**Supplementary**

**Table S1. The EEG diagnosis of all the enrolled epilepsy.**

| **Patients** | **Gender** | **Age** | **EEG diagnosis** |
| --- | --- | --- | --- |
| **Patients with cognitive** | F | 70 | Abnormal EEG. Epileptic discharge in bilateral frontal and temporal regions |
| M | 70 | Abnormal EEG. Slow waves appear in both temporal regions |
| M | 71 | Abnormal EEG. Epileptic discharge in bilateral frontal and temporal regions |
| F | 74 | Abnormal EEG. The basic rhythm slows down in the background EEG activity |
| F | 74 | Abnormal EEG. Slow waves appear in both temporal regions |
| M | 77 | Abnormal EEG. Epileptic discharge in the temporal region |
| F | 77 | Abnormal EEG. Epileptic discharges in the left temporal region |
| M | 79 | Abnormal EEG. Epileptic discharge in the temporal region |
| M | 66 | Abnormal EEG. θ wave increased slightly in the background EEG activity |
| M | 66 | Abnormal EEG. Slow waves appear in both temporal regions |
| F | 77 | Abnormal EEG. More moderate θ waves were seen in the background |
| F | 78 | Abnormal EEG. Epileptic discharge in bilateral frontal area |
| F | 78 | Abnormal EEG. Epileptic discharges in the left temporal region |
| M | 79 | Abnormal EEG. θ wave increased slightly in the background EEG activity |
| M | 80 | Abnormal EEG. θ wave increased slightly in the background EEG activity |
| M | 65 | Abnormal EEG. Epileptic discharge in the left temporal |
| F | 65 | Abnormal EEG. Epileptic discharge in the right frontal region |
| M | 65 | Abnormal EEG. Epileptic discharges in the left temporal region |
| M | 66 | Abnormal EEG. Epileptic discharges in the left temporal region |
| M | 66 | Abnormal EEG. Epileptic discharge in bilateral frontal area |
| F | 66 | Abnormal EEG. Epileptic discharge in the left temporal region |
| M | 66 | Abnormal EEG. Epileptic discharge in the left temporal |
| F | 67 | Abnormal EEG. Epileptic discharge in bilateral frontal area |
| F | 67 | Abnormal EEG. Epileptic discharge in the right frontal region |
| M | 68 | Abnormal EEG. Epileptic discharge in the right frontal region |
| M | 68 | Abnormal EEG. Epileptic discharge in bilateral frontal and temporal regions |
| M | 68 | Abnormal EEG. More moderate θ waves were seen in the background |
| F | 69 | Abnormal EEG. The basic rhythm slows down in the background EEG activity |
| M | 69 | Abnormal EEG. Epileptic discharge in bilateral frontal area |
| M | 69 | Abnormal EEG. Epileptic discharge in the anterior temporal region and the middle temporal region |
| F | 69 | Abnormal EEG. Epileptic discharge in bilateral frontal and temporal regions |
| F | 69 | Abnormal EEG. Epileptic discharge in bilateral frontal area |
| M | 72 | Abnormal EEG. Epileptic discharge in bilateral temporal regions |
| M | 72 | Abnormal EEG. Epileptic discharges in bilateral temporal regions |
| M | 65 | Abnormal EEG. Epileptic discharge in bilateral frontal and temporal regions |
| M | 72 | Abnormal EEG. Epileptic discharges in the left temporal region |
| F | 72 | Abnormal EEG. Epileptic discharge in the right frontal region |
| F | 73 | Abnormal EEG. Epileptic discharge in bilateral frontal area |
| F | 73 | Abnormal EEG. Epileptic discharge in bilateral temporal region |
| M | 73 | Abnormal EEG. Epileptic discharges in the frontal and temporal region |
| M | 73 | Abnormal EEG. Epilepsy discharges in the right frontal pole, frontal, central, anterior middle temporal region |
| M | 65 | Abnormal EEG. Epileptic discharge in bilateral frontal and temporal regions |
| F | 78 | Abnormal EEG. Epileptic discharges in temporal and occipital region |
| F | 65 | Abnormal EEG. Epileptic discharges in temporal and occipital region |
| M | 78 | Abnormal EEG. Epilepsy discharges in the frontal and temporal regions, with the temporal region as the dominant |
| M | 78 | Abnormal EEG. Epileptic discharges in the frontal and temporal region |
| F | 78 | Abnormal EEG. Epileptic discharges in the former temporal region |
| M | 78 | Abnormal EEG. Slow waves appear in both temporal regions |
| M | 78 | Abnormal EEG. Epileptic discharge in the left frontal lobe |
| F | 75 | Abnormal EEG. Epileptic discharge in the right frontal region |
| F | 65 | Abnormal EEG. Epileptic discharge in bilateral frontal area |
| M | 75 | Abnormal EEG. Epilepsy discharges in the frontal and temporal regions, with the temporal region as the dominant |
| M | 75 | Abnormal EEG. Epileptic discharges in the left temporal region |
| M | 75 | Abnormal EEG. Epileptic discharge in bilateral temporal region |
| F | 79 | Abnormal EEG. Epileptic discharge in the anterior temporal region and the middle temporal region |
| M | 79 | Abnormal EEG. Epileptic discharge in bilateral frontal area |
| M | 65 | Abnormal EEG. Epileptic discharges in temporal and occipital region |
| F | 79 | Abnormal EEG. The basic rhythm slows down in the background EEG activity |
| M | 79 | Abnormal EEG. Epileptic discharge in bilateral frontal and temporal regions |
| F | 79 | Abnormal EEG. Epileptic discharge in the left occipital |
| M | 79 | Abnormal EEG. Epileptic discharges in the frontal and temporal region |
| F | 80 | Abnormal EEG. Epileptic discharges in temporal and occipital region |
| F | 67 | Abnormal EEG. Epileptic discharges on the left forehead |
| M | 68 | Abnormal EEG. Epileptic discharge in bilateral temporal region |
| M | 65 | Abnormal EEG. Epileptic discharge in the temporal region |
| M | 65 | Abnormal EEG. Epileptic discharge in the frontal and central regions |
| F | 66 | Abnormal EEG. Epileptic discharges in the former temporal region |
| F | 66 | Abnormal EEG. Epileptic discharge in the anterior temporal region and the middle temporal region |
| F | 74 | Abnormal EEG. Epileptic discharge in bilateral temporal region |
| M | 75 | Abnormal EEG. Epileptic discharge in the anterior temporal region and the middle temporal region |
| F | 65 | Abnormal EEG. Epileptic discharge in bilateral temporal regions |
| M | 65 | Abnormal EEG. Epileptic discharge in the temporal region |
| M | 65 | Abnormal EEG. Epileptic discharge in bilateral frontal and temporal regions |
| F | 65 | Abnormal EEG. Epileptic discharge in the left frontal region |
| M | 65 | Abnormal EEG. Epileptic discharge in the left temporal lobe |
| **Patients without cognitive** | M | 64 | Abnormal EEG. Epileptic discharge in the temporal region |
| F | 65 | Abnormal EEG. Epileptic discharge in bilateral frontal area |
| M | 68 | Abnormal EEG. Epileptic discharge in bilateral frontal area |
| M | 68 | Abnormal EEG. Epileptic discharge in the anterior temporal region and the middle temporal region |
| F | 69 | Abnormal EEG. Epileptic discharge in the bilateral occipital regions |
| F | 69 | Abnormal EEG. Epileptic discharge in the left frontal region |
| M | 70 | Abnormal EEG. Epileptic discharge in bilateral frontal area |
| F | 70 | Abnormal EEG. Epileptic discharge in bilateral frontal area |
| F | 71 | Abnormal EEG. Epileptic discharge in the left parietal occipital region |
| M | 71 | Abnormal EEG. Epileptic discharge in bilateral frontal and temporal regions |
| F | 72 | Abnormal EEG. Epileptic discharges in bilateral temporal regions |
| M | 74 | Abnormal EEG. Epileptic discharge in the left frontal region |
| F | 74 | Abnormal EEG. Epileptic discharge in bilateral temporal region |
| M | 75 | Abnormal EEG. Epileptic discharge in bilateral frontal area |
| F | 75 | Abnormal EEG. Epileptic discharge in the former temporal region |
| F | 75 | Abnormal EEG. Epileptic discharge in bilateral temporal region |
| M | 77 | Abnormal EEG. Epileptic discharge in bilateral frontal area |
| M | 78 | Abnormal EEG. Epileptic discharges in the left temporal region |
| M | 78 | Abnormal EEG. The basic rhythm slows down in the background EEG activity |
| M | 78 | Abnormal EEG. Slow waves appear in both temporal regions |
| M | 80 | Abnormal EEG. θ wave increased slightly in the background EEG activity |
| F | 80 | Abnormal EEG. Epileptic discharge in bilateral frontal and temporal regions |
| F | 64 | Abnormal EEG. Epileptic discharge in the anterior temporal region and the middle temporal region |
| F | 64 | Abnormal EEG. Epileptic discharge in bilateral temporal region |
| M | 64 | Abnormal EEG. Epileptic discharges in temporal and occipital region |
| F | 64 | Abnormal EEG. Epileptic discharges on the left forehead |
| M | 64 | Abnormal EEG. Epileptic discharge in the right frontal region |
| M | 64 | Abnormal EEG. Epileptic discharge in bilateral frontal and temporal regions |
| F | 64 | Abnormal EEG. Slow waves appear in both temporal regions |
| F | 64 | Abnormal EEG. Epileptic discharge in the left frontal region |
| F | 65 | Abnormal EEG. Epileptic discharges in temporal and occipital region |
| M | 65 | Abnormal EEG. Epileptic discharges in the frontal and temporal region |
| M | 65 | Abnormal EEG. Epileptic discharge in bilateral frontal area |
| F | 65 | Abnormal EEG. Epileptic discharge in the bilateral occipital regions |
| F | 65 | Abnormal EEG. Epileptic discharge in bilateral frontal area |
| F | 65 | Abnormal EEG. Slow waves appear in both temporal regions |
| M | 65 | Abnormal EEG. Epileptic discharge in the left parietal occipital area |
| M | 65 | Abnormal EEG. Epileptic discharge in the bilateral occipital regions |
| F | 66 | Abnormal EEG. Epileptic discharge in bilateral frontal area |
| F | 66 | Abnormal EEG. Epileptic discharges in the former temporal region |
| F | 66 | Abnormal EEG. Epileptic discharges in the frontal and temporal region |
| M | 66 | Abnormal EEG. Epileptic discharges in bilateral temporal regions |
| M | 66 | Abnormal EEG. Epileptic discharges on the left forehead |
| M | 67 | Abnormal EEG. Epileptic discharge in the right frontal region |
| F | 67 | Abnormal EEG. Epileptic discharge in the left parietal occipital region |
| F | 67 | Abnormal EEG. Epileptic discharge in the right frontal region |
| F | 67 | Abnormal EEG. Epileptic discharge in the anterior temporal region and the middle temporal region |
| M | 68 | Abnormal EEG. Epileptic discharge in the left parietal occipital area |
| F | 68 | Abnormal EEG. Epileptic discharge in bilateral temporal region |
| F | 68 | Abnormal EEG. Epileptic discharges in the frontal and temporal region |
| F | 68 | Abnormal EEG. Epileptic discharge in bilateral frontal and temporal regions |
| M | 69 | Abnormal EEG. Slow waves appear in both temporal regions |
| F | 69 | Abnormal EEG. Slow waves appear in both temporal regions |
| F | 69 | Abnormal EEG. θ wave increased slightly in the background EEG activity |
| M | 70 | Abnormal EEG. Epileptic discharge in the right frontal region |
| M | 70 | Abnormal EEG. Epileptic discharge in bilateral frontal and temporal regions |
| F | 70 | Abnormal EEG. Epileptic discharge in bilateral frontal and temporal regions |
| F | 70 | Abnormal EEG. Epileptic discharges in bilateral temporal regions |
| F | 70 | Abnormal EEG. Epileptic discharge in the frontal and central regions |
| M | 70 | Abnormal EEG. Epileptic discharge in the left frontal pole and frontal regions |
| M | 70 | Abnormal EEG. Epileptic discharges in the frontal and temporal region |
| M | 70 | Abnormal EEG. Epileptic discharge in the frontal and central regions |
| F | 71 | Abnormal EEG. Epilepsy discharges in the frontal and temporal regions, with the temporal region as the dominant |
| F | 71 | Abnormal EEG. Epilepsy discharges in the right frontal pole, central, anterior middle temporal region |
| F | 71 | Abnormal EEG. Epileptic discharge in the right frontal region |
| F | 71 | Abnormal EEG. Epileptic discharge in the middle and top area of both sides |
| M | 71 | Abnormal EEG. Epileptic discharge in bilateral frontal area |
| M | 73 | Abnormal EEG. Epileptic discharge in bilateral frontal area |
| F | 74 | Abnormal EEG. Epileptic discharge in the frontal and central regions |
| F | 71 | Abnormal EEG. Epileptic discharge in bilateral frontal area |
| M | 71 | Abnormal EEG. Epileptic discharges in the left temporal region |
| M | 72 | Abnormal EEG. Epileptic discharge in the right frontal region |
| F | 72 | Abnormal EEG. Epileptic discharges in bilateral temporal regions |
| M | 72 | Abnormal EEG. Epileptic discharge in the right frontal region |
| F | 73 | Abnormal EEG. Epileptic discharge in bilateral frontal and temporal regions |
| F | 73 | Abnormal EEG. Epileptic discharge in bilateral frontal and temporal regions |
| F | 73 | Abnormal EEG. Epileptic discharges in the left temporal region |
| M | 73 | Abnormal EEG. Epileptic discharge in bilateral frontal and temporal regions |
